# Supplementary material for: Spectroscopic and reactive characterization of mixed-metal Fe–Cr trimer nodes in metal–organic framework MIL-100
Source: Royal Society of Chemistry journal article supplement (doi:10.1039/d3cc00100h), 2023-01-01
Supplement: d3cc00100h1.pdf [file d3cc00100h1.pdf]

# Supporting Information

## **Spectroscopic and Reactive Characterization of Mixed-Metal Fe-Cr Trimer Nodes in Metal-Organic Framework MIL-100**

Jacklyn N. Hall, and Praveen Bollini\*

William A. Brookshire Department of Chemical and Biomolecular Engineering; University of Houston; Houston, TX 77204, USA

\*Corresponding author: [ppbollini@uh.edu](mailto:ppbollini@uh.edu)

## Table of Contents

| Section No. | Title                                                 | Page No.       |
|-------------|-------------------------------------------------------|----------------|
| <b>S1</b>   | <b>Experimental Procedures</b>                        | <b>S2 – S5</b> |
| S1.1        | MIL-100(Fe) and MIL-100(Cr) Synthesis                 | S2             |
| S1.2        | Mixed Fe-Cr MIL-100 Synthesis                         | S2             |
| S1.3        | Materials Characterization                            | S3             |
| S1.4        | In-Situ Infrared Spectroscopy Experiments             | S3 – S4        |
| S1.5        | Steady State CO Oxidation with N <sub>2</sub> O       | S4             |
| S1.6        | Stoichiometric N <sub>2</sub> O Reaction Measurements | S4 – S5        |
| S1.7        | NO Breakthrough Adsorption Measurements               | S5             |
| <b>S2</b>   | <b>Supplementary Results and Discussion</b>           | <b>S5 – S7</b> |
| S2.1        | XRD and N <sub>2</sub> Physisorption Results          | S5             |
| S2.2        | Target/Measured Fe-Cr Compositions in MIL-100(Fe,Cr)  | S6             |
| S2.3        | XPS Peak Fitting for MIL-100(Fe) and MIL-100(Cr)      | S6             |
| S2.4        | Schematic of M <sub>3</sub> O Vibrational Modes       | S7             |
| <b>S3</b>   | <b>References</b>                                     | <b>S7</b>      |

## S1. Experimental Procedures

### *S1.1. MIL-100(Fe) and MIL-100(Cr) Synthesis*

MIL-100(Fe) and MIL-100(Cr) were synthesized and thoroughly characterized in previous work,<sup>1,2</sup> following synthesis protocols adapted, respectively, from Zhang *et al.*<sup>3</sup> and Mao *et al.*<sup>4</sup> Characterization results for both materials are presented in this work as a comparison to bimetallic (Fe and Cr) materials analyzed herein.

### *S1.2. Mixed Fe-Cr MIL-100 Synthesis*

Mixed metal MIL-100 samples of various Fe and Cr content were synthesized by adapting a low temperature, ambient pressure synthesis route previously reported for the synthesis of MIL-100(Fe) by Zhang *et al.*<sup>3</sup> Fe(NO<sub>3</sub>)<sub>3</sub>·9H<sub>2</sub>O (Alfa Aesar, > 98%) and Cr(NO<sub>3</sub>)<sub>3</sub>·9H<sub>2</sub>O (Thermo Scientific Chemicals, ≥ 98.5%) were combined in various molar ratios - 0.75Fe:0.25Cr, 0.50Fe:0.50Cr, 0.25Fe:0.75Cr - at a total mass of 16.16 g and mixed with 7.56 g of trimesic acid (Alfa Aesar, 98%) and 24 mL deionized water (18.3 MΩ) in a 250 mL round-bottom flask. The synthesis mixture was mixed at 600 rpm for 14 hours at 368 K in an oil bath. Next, the produced material was washed alternately with deionized water and ethanol (Decon Laboratories Inc., 200 Proof) in 160 mL quantities at 343 K for a total of three washes with each respective solvent. The solid sample was separated from fresh ethanol by centrifugation (4000 rpm, 3 minutes) and allowed to dry overnight at 348 K to remove excess solvent. Lastly, the samples were dried at 423 K in a vacuum oven (MTI Corporation,  $P < 3 \times 10^{-3}$  bar) for 10 hours. The mixed-metal series of MIL-100 samples are denoted using the following nomenclature: MIL-100(XFe,YCr), where X and Y are the percentage of Fe and Cr, respectively, per total metal, used for the synthesis of the material, not the final composition of the synthesized MOFs.

### *S1.3. Materials Characterization*

N<sub>2</sub> physisorption experiments were conducted with a Micromeritics 3Flex Surface Characterization system. Prior to analysis, 0.05 g of sample was treated at 423 K for 15 hours under vacuum ( $P \sim 10^{-4}$  bar) using a Micromeritics VacPrep degassing unit. Powder X-ray diffraction (XRD) data were collected with an Empyrean Malvern Panalytical diffractometer with a Cu K $\alpha$  X-ray source ( $\lambda = 1.54$  Å). Materials were prepared for analysis in glass sample holders (Rigaku, 0.2 mm indentation) with approximately 0.02 g of sample. Diffraction patterns were collected at a step size of 0.013° and scan rate of 23.8 s per step in the range of 2.5 – 20°. Inductively coupled plasma – optical emission spectrometry (ICP-OES) measurements (Agilent 725; Department of Earth and Atmospheric Sciences at the University of Houston). X-ray photoelectron spectroscopy (XPS) measurements were completed with a Physical Electronics PHI 5800 ESCA system equipped with an Al K $\alpha$  X-ray source (1486.6 eV) in the Department of Chemistry at the University of Houston. Calibration of the XPS data was completed by shifting the C 1s binding energy to 284.6 eV.

### *S1.4. In-Situ Infrared Spectroscopy Experiments*

Fourier-transmission infrared (FT-IR) spectroscopy measurements were conducted on a Nicolet iS50 FT-IR Spectrometer (Thermo Scientific) using a Harrick Dewar Transmission/Reflection Accessory stainless steel in-situ analysis cell. Spectra were collected averaging 64 scans at 4 cm<sup>-1</sup> resolution in the range of 720-4000 cm<sup>-1</sup> using a deuterated triglycine sulfate (DTGS) detector. The temperature of the samples was monitored using a built-in K-type thermocouple placed near the sample holder and was regulated by a temperature controller (Harrick, 110V). Analysis of the infrared spectra of as-synthesized MIL-100 samples was conducted at 298 K under N<sub>2</sub> flow

(Matheson, Ultra High Purity, 100 mL min<sup>-1</sup>) after purging for a minimum of 6 hours and using the spectra of the empty cell under the same conditions as a background reference for all spectra.

For in-situ characterization of NO adsorption, samples were first thermally activated at 523 K under a 50 mL min<sup>-1</sup> N<sub>2</sub> flow for 15 hours. Next, samples were cooled to 473 K and allowed to dwell at the adsorption temperature for 1 hour. Spectra of the sample at 473 K were used as a background reference prior to adsorption measurements. NO (Matheson, Research Grade) was introduced at 0.003 kPa at 473 K and minimum of 0.5 h was allowed for complete saturation to occur at this condition. Samples were then cooled under NO flow to 313 K and spectra measured under this condition.

#### *SI.5. Steady State CO Oxidation with N<sub>2</sub>O*

Catalytic experiments for the oxidation of CO with N<sub>2</sub>O were conducted using a reactor system described previously for kinetic measurements.<sup>5</sup> Briefly, approximately 0.2 g of sample (180 – 425 μm particles) were loaded and supported by quartz wool (CE Elantech) within a stainless steel tube and mounted vertically within a single-zone furnace (1060 W/115 V, Applied Test System Series 3210). The temperature of the sample was determined by a K-type thermocouple placed at the top of the catalyst bed. Thermal pretreatment of the samples was conducted at 523 K for 12 hours under He (Matheson, Ultra High Purity) flow (50 mL min<sup>-1</sup>). Reaction feeds of N<sub>2</sub>O (Matheson, Research Purity) and CO (Matheson, Ultra High Purity) in He carrier were fed to the catalyst bed at 473 K for reaction at constant total flow rates of 65 mL min<sup>-1</sup>.

#### *SI.6. Stoichiometric N<sub>2</sub>O Reaction Measurements*

The stoichiometric reaction of N<sub>2</sub>O over the activated catalyst samples was conducted at 473 K using 64 kPa N<sub>2</sub>O in Helium with Ar as an internal standard at a total flow rate of 65 mL min<sup>-1</sup>. At the start of the measurements (t = 0 minutes), the reactant mixture was introduced to the catalyst

bed and the transient N<sub>2</sub> formation profile was monitored using an online mass spectrometer (MKS Cirrus 2) located at the outlet of the reactor. The cumulative quantity of N<sub>2</sub> formed (mol g<sub>catalyst</sub><sup>-1</sup>) was used as a representation of the total available active site density in this material, assuming one mole of N<sub>2</sub> is formed per mole active center.

### S1.7. NO Breakthrough Adsorption Measurements

NO breakthrough adsorption measurements were conducted using the reactor system described in Section 2.5. Thermally activated samples were exposed to 0.003 kPa NO (1000 ppm NO/N<sub>2</sub> gas mixture, Research Grade) in He (Matheson, Ultra High Purity) at 473 K and the quantity of NO adsorbed was measured by a mass spectrometer through comparison of the breakthrough curve for NO with respect to Ar (internal standard).

## S2. Supplementary Results and Discussion

### S2.1. XRD and N<sub>2</sub> Physisorption Results

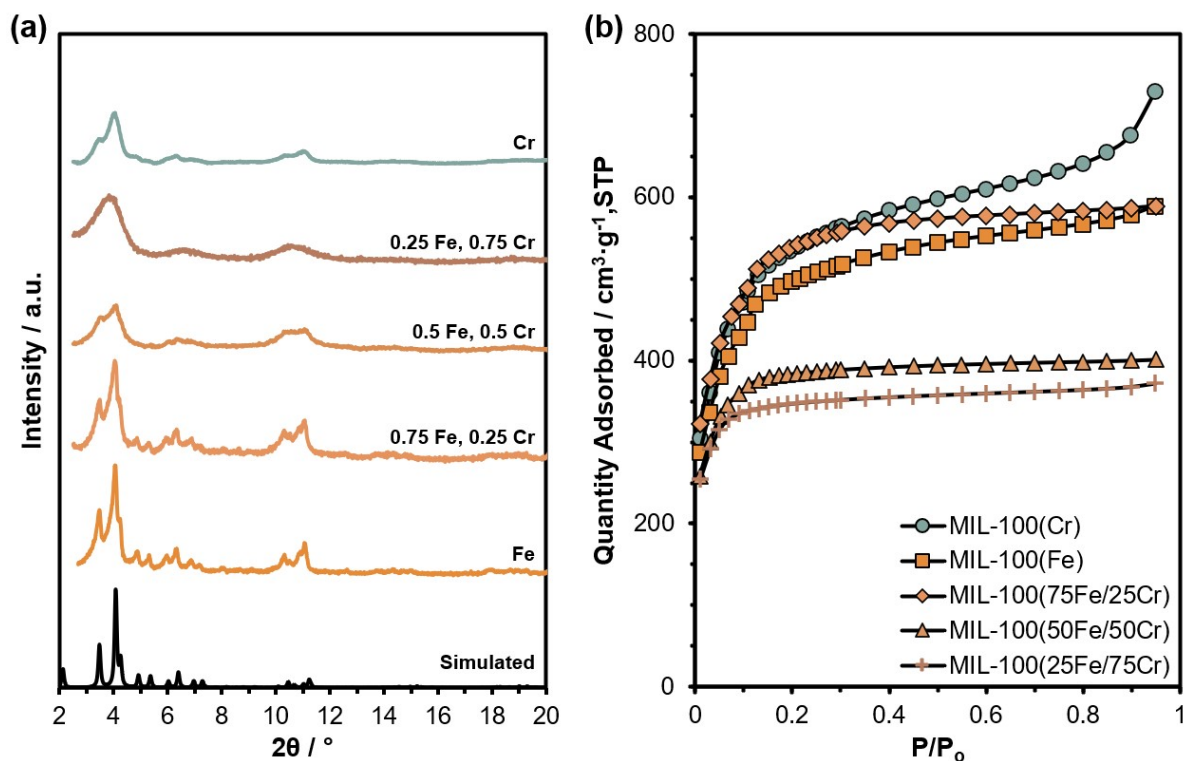

**Figure S1.** (a) N<sub>2</sub> physisorption isotherms (77 K) and (b) powder X-ray diffraction patterns for MIL-100 samples synthesized with various molar ratios of Fe and Cr.

### S2.2. Target/Measured Fe-Cr Compositions in MIL-100(Fe,Cr)

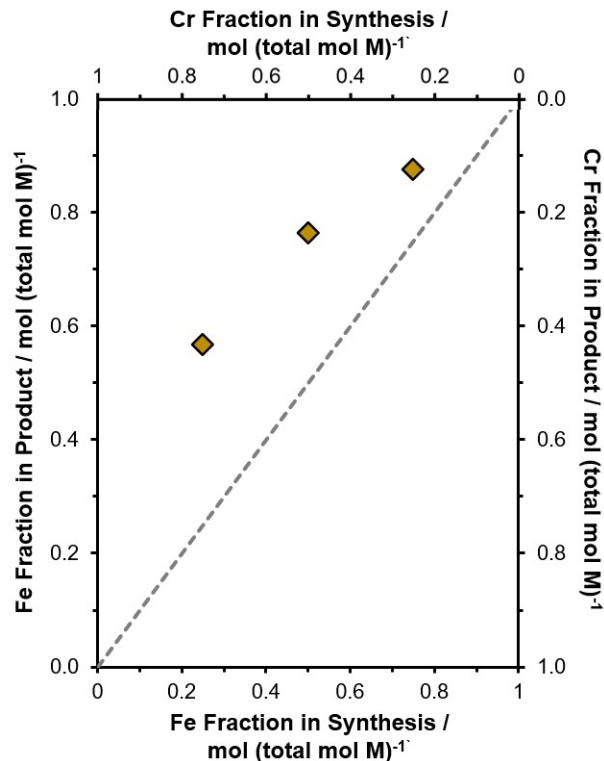

**Figure S2.** Comparison of the iron and chromium fractions (mol (total mol M)<sup>-1</sup>) used in the synthesis of mixed-metal MIL-100(Fe/Cr) samples and that in the final material, as estimated by ICP-OES.

### S2.3. XPS Peak Fitting for MIL-100(Fe) and MIL-100(Cr)

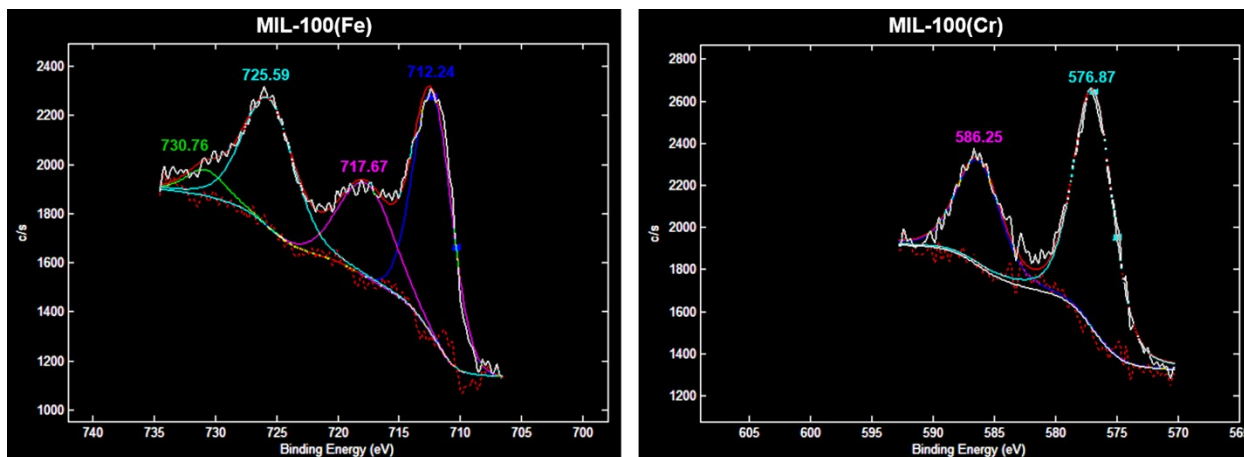

**Figure S3.** Fe2p and Cr2p spectral lines in the XPS spectra of MIL-100(Fe) and MIL-100(Cr), respectively.

#### S2.4. Schematic of $M_3O$ Vibrational Modes

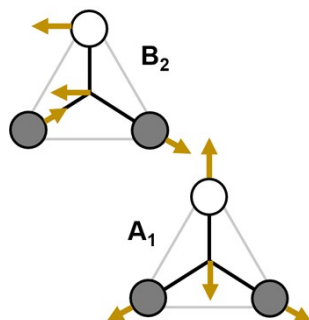

**Figure S4.**  $A_1$  and  $B_2$  asymmetric vibrational modes of the  $M_3O$  units in MIL-100.

### S3. References

- 1 J. N. Hall and P. Bollini, *Chem. Eur. J.*, 2020, **26**, 16639–16643.
- 2 J. N. Hall and P. Bollini, *AIChE J.*, 2021, **67**, e17496.
- 3 F. Zhang, J. Shi, Y. Jin, Y. Fu, Y. Zhong and W. Zhu, *Chem. Eng. J.*, 2015, **259**, 183–190.
- 4 Y. Mao, H. Qi, G. Ye, L. Han, W. Zhou, W. Xu and Y. Sun, *Microporous Mesoporous Mater.*, 2019, **274**, 70–75.
- 5 J. N. Hall, A. J. Kropf, M. Delferro and P. Bollini, (*under review*).
